# Supplementary material for: A pathophysiological role of PDE3 in allergic airway inflammation
Source: JCI journal article supplement (doi:10.1172/jci.insight.94888), 2018-01-24

## **A pathophysiological role of PDE3 in allergic airway inflammation**

Jan Beute<sup>1</sup>, Melanie Lukkes<sup>1</sup>, Ewout P. Koekoek<sup>1</sup>, Hedwika Nastiti<sup>1</sup>, Keerthana Ganesh<sup>1</sup>, Marjolein J.W. de Bruijn<sup>1</sup>, Steve Hockman<sup>2</sup>, Menno van Nimwegen<sup>1</sup>, Gert Jan Braunstahl<sup>3</sup>, Louis Boon<sup>4</sup>, Bart N. Lambrecht<sup>1,5</sup>, Vince C. Manganiello<sup>2</sup>, Rudi W. Hendriks<sup>1</sup> and Alex KleinJan<sup>1</sup>

<sup>1</sup> Department of Pulmonary Medicine, Erasmus MC, 's-Gravendijkwal 230, 3015 CE Rotterdam, The Netherlands; <sup>2</sup> Cardiovascular and Pulmonary Branch, National Heart, Lung, and Blood Institute, NIH, Bethesda, MD USA, <sup>3</sup> Department of Pulmonology, Sint Franciscus Gasthuis, Rotterdam, The Netherlands, <sup>4</sup> Epirus Biopharmaceuticals Netherlands Yalelaan 46, 3584 CM Utrecht, The Netherlands and <sup>5</sup> VIB Center for Inflammation Research, Ghent University, Technologiepark 15, Ghent B-9052, Belgium

Corresponding author: Alex KleinJan, PhD Department of Pulmonary Medicine, Erasmus MC, 's-Gravendijkwal 230, 3015 CE, Rotterdam, The Netherlands. a.kleinjan@erasmusmc.nl

Running title: A Pathophysiological Role of PDE3 in Allergic Airway Inflammation

## Supplementary data/figures

Supplementary table 1

| Gene         |   | Primer Sequence           | Tm<br>(°C) | Position       | Product<br>Length<br>(bp) |
|--------------|---|---------------------------|------------|----------------|---------------------------|
| <b>PDE3A</b> | F | aaagacaagcttgctattc AAA   | 59         | 1286 -<br>1308 | 74                        |
|              | R | gtggaagaaactcgtctcaaca    | 59         | 1338 -<br>1359 |                           |
| <b>PDE3B</b> | F | tgca gtttggtatctgacaacac  | 60         | 2594 -<br>2616 | 112                       |
|              | R | aattcgcccatggtaattct      | 59         | 2685 -<br>2705 |                           |
| <b>PDE4A</b> | F | gccacgcctgcactagat        | 59         | 1282 -<br>1299 | 89                        |
|              | R | ccagggtgatccacatcg        | 60         | 1353 -<br>1370 |                           |
| <b>PDE4B</b> | F | cgctttggagtcaacactga      | 59         | 1166 -<br>1185 | 104                       |
|              | R | ttgtgagaatatccagccaca     | 60         | 1249 -<br>1269 |                           |
| <b>PDE4C</b> | F | ccatgtctcggaactcctct      | 59         | 418 - 437      | 67                        |
|              | R | gcaaaggcggtcacaatc        | 60         | 467 - 484      |                           |
| <b>PDE4D</b> | F | gacctctctc caaagtctatgtcc | 59         | 542 - 565      | 72                        |
|              | R | cacaatcaagtc atctccgtgt   | 60         | 592 - 613      |                           |

**Supplementary table 1.** Primers used for investigating PDE3&4 expression in human lung biopsies (forward (F) and reverse (r)).



Supplementary table 2

| Gene         |   | Primer Sequence        | Tm<br>(°C) | Position       | Product<br>Length<br>(bp) |
|--------------|---|------------------------|------------|----------------|---------------------------|
| <b>PDE3A</b> | F | cccagaccatgatcttctg    | 60         | 2303 -<br>2322 | 95                        |
|              | R | ccaggtgttcaactgatcca   | 59         | 2378 -<br>2397 |                           |
| <b>PDE3B</b> | F | agaaagcctgcagggagtta   | 59         | 2087 -<br>2106 | 94                        |
|              | R | ggatccagtgacacttctga   | 60         | 2160 -<br>2180 |                           |
| <b>PDE4A</b> | F | gcgtctccaaccagttccta   | 60         | 1608 -<br>1627 | 107                       |
|              | R | cagcagcttgaatcccaca    | 60         | 1696 -<br>1714 |                           |
| <b>PDE4B</b> | F | ctttctacgccggcactg     | 60         | 1437 -<br>1454 | 72                        |
|              | R | gatggcagctgcaaaaatg    | 60         | 1490 -<br>1508 |                           |
| <b>PDE4C</b> | F | cacactcacagcgaggt      | 59         | 117 - 134      | 109                       |
|              | R | cactggctctcggactcg     | 60         | 208 - 225      |                           |
| <b>PDE4D</b> | F | aaaccaagaaggtgacaagctc | 59         | 1432 -<br>1453 | 88                        |
|              | R | gcacagtgacacatattctga  | 59         | 1499 -<br>1519 |                           |

**Supplementary table 2.** Primers used for investigating PDE3&4 expression in mouse lung (forward (F) and reverse (r)).

### **Supplementary Figure 1 PDE3A and PDE3B are expressed in the human airways**

Staining with monoclonal antibodies specific for PDE3A protein or PDE3B protein identified PDE3. Staining is seen in the epithelial tissue and lamina propria of human airway mucosal biopsies. A dark violet hematoxylin nucleus-specific staining was performed to characterize the cells. Epithelial cells (a) stained positive for PDE3A. PDE3B protein can be seen, pointed out by arrows, in the bronchus mucosa in inflammatory cells (b) and structural cells such as epithelium (c), muscle cells (d) and endothelium cells (e). Messenger RNA transcription levels are shown for PDE3 and PDE4 in human lung mucosal biopsies obtained from healthy controls (n=19) and mild allergic asthma patients (n=28) (C) and Tissue eosinophilic inflammation (number of major basic protein positive cells) is seen in lung mucosal biopsies of asthmatics and healthy controls (D).

### **Supplementary Figure 2 PDE3A and PDE3B are expressed in the mice airways and immune cells.**

Messenger RNA transcription levels are shown for PDE3 and PDE4 of murine lungs obtained from PBS treated control mice (n=3) or from HDM treated asthmatic mice (n=7) (A). Additionally, the gene muc5a has been included in the mouse qPCR assay, as an internal control for asthma severity (A). Shown are PDE3B mRNA expression levels of unstimulated or IgM stimulated B-cells (B) and PBS (unstimulated) and house dust mite stimulated DCs (C). Sorted naïve T-cells and in vitro differentiated Th subsets were analyzed for PDE3 and PDE4 mRNA expression (D). Mann-Whitney U test followed. Error bars show mean and  $\pm$  SEM, Mann-Whitney U test (\*=P<0.05;\*\*=P<0.01)).

### **Supplementary Figure 3.**

Allergic airway inflammation of indicated cells (data represent 2 separate experiments). Kruskal-Wallis test for multiple comparisons was used followed by Mann-Whitney U test. Error bars show mean and  $\pm$  SEM, (n=3 for all PBS groups, n=7 for WT HDM, n=5 for both PDE3A-/- and PDE3-/- HDM groups (\*=P<0.05;\*\*=P<0.01)).

#### Supplementary Figure 4.

##### Dose and route optimization of enoximone therapy in mice.

Different treatment modes were tested i.c. route and dosage. Here we tested the oral versus intratracheal route (intratracheal dosing is undertaken simultaneously with HDM treatment) and PBS versus enoximone in a HDM-driven allergic airway inflammation model. For the oral route, Enoximone was precipitated from Perfan<sup>®</sup>. Since we used clinical grade enoximone, the precipitate was administered with HDM solution and used as a suspension for intratracheal treatment (doses 25 µg and 250 µg) or it was used as a suspension administered in PBS for oral treatment (doses 250 µg or 2.5 mg). Mice underwent enoximone treatment only during challenge. Sensitization was performed with 1 µg HDM and challenge with 2.5 - 5 µg HDM. Experimental HDM asthma study design using intratracheal sensitization (s) and challenge (c) with 10 µg HDM or PBS as a control and enoximone (e) therapy. Mice were treated orally with 250, 25, 2.5 and 0.25 µg enoximone (enox) admixed with PBS or with PBS only as a control during sensitization and challenge. Analyses (a) were performed 1 day after the last challenge (A). Quantification of flow cytometric analyses of the indicated populations of BAL cells (B).

Comparison between oral (systemic) and intratracheal (topical (it)) enoximone therapy during challenge phase either admixed with HDM challenge or admixed with PBS in cases of oral therapy. Quantification of flow cytometric analyses was plotted in indicated populations of BAL cells (C). Ranking score results of albumin leakage judged from the lung tissue sections (D). Kruskal-Wallis test for multiple comparisons was used followed by Mann-Whitney U test. Error bars show mean and  $\pm$  SEM (n=3 for PBS, n=3-5 for HDM HDM groups; (\*=P<0.05; \*\*=P<0.01)).

Supplementary Figure 1

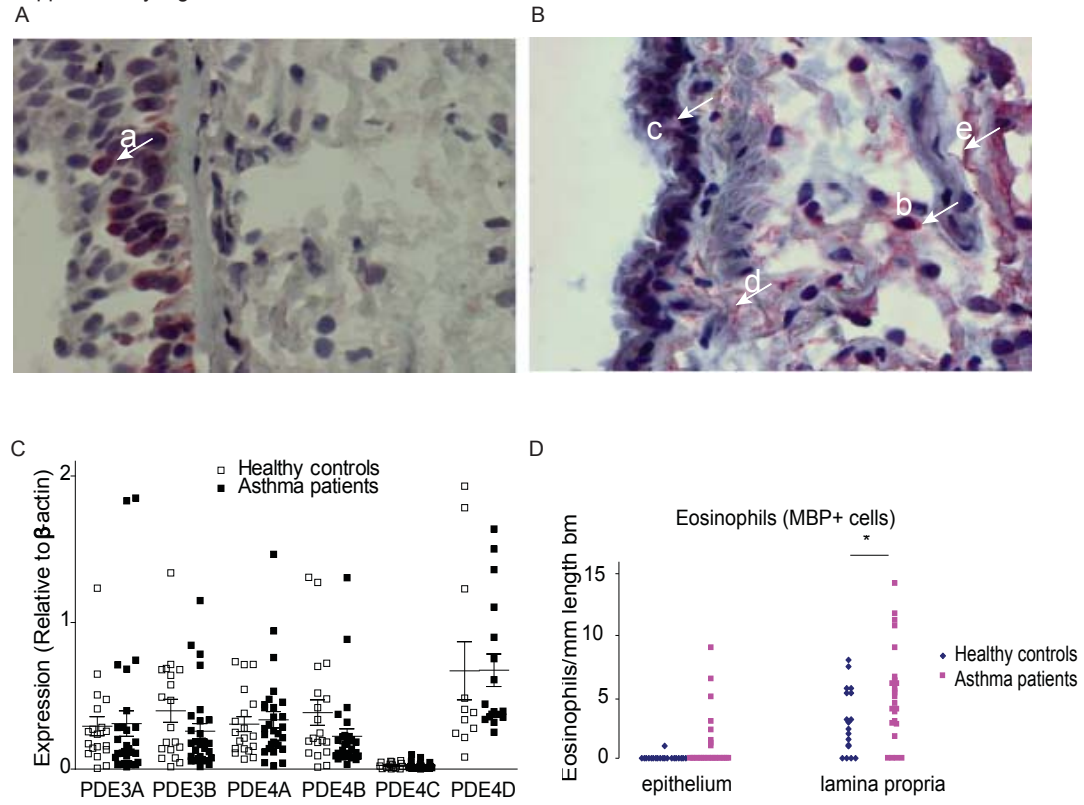



Supplementary Figure 3

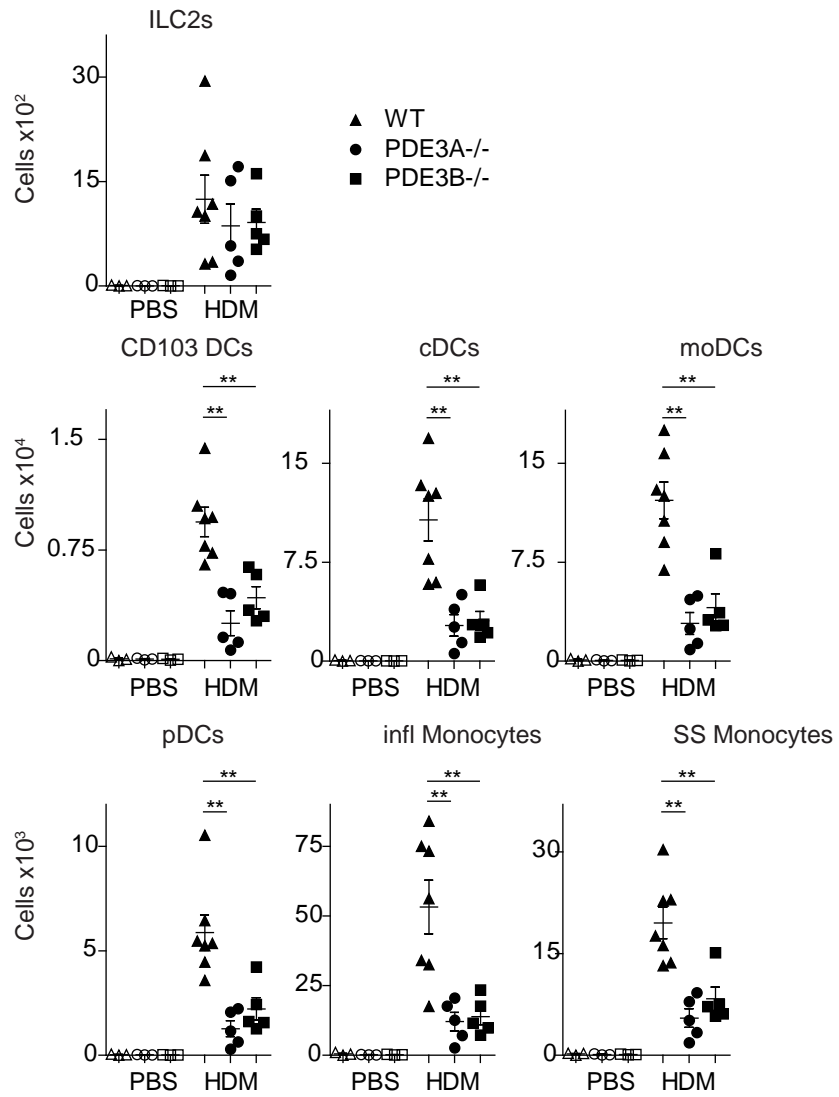

Supplementary Figure 2

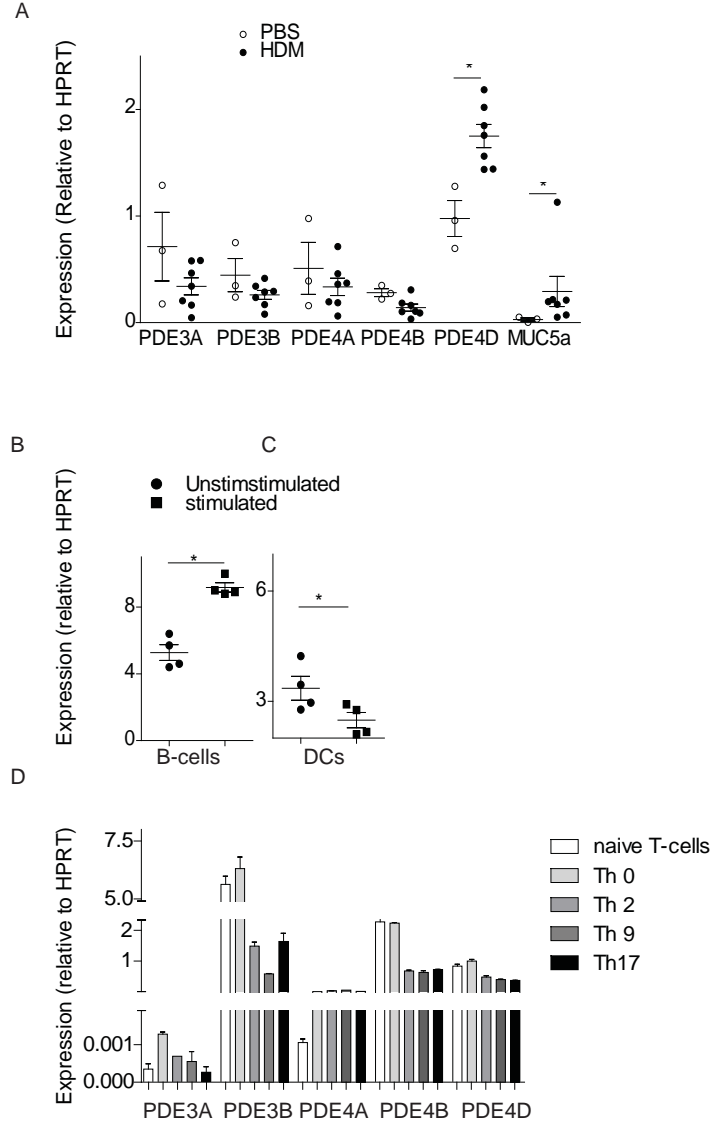

Supplementary Figure 4

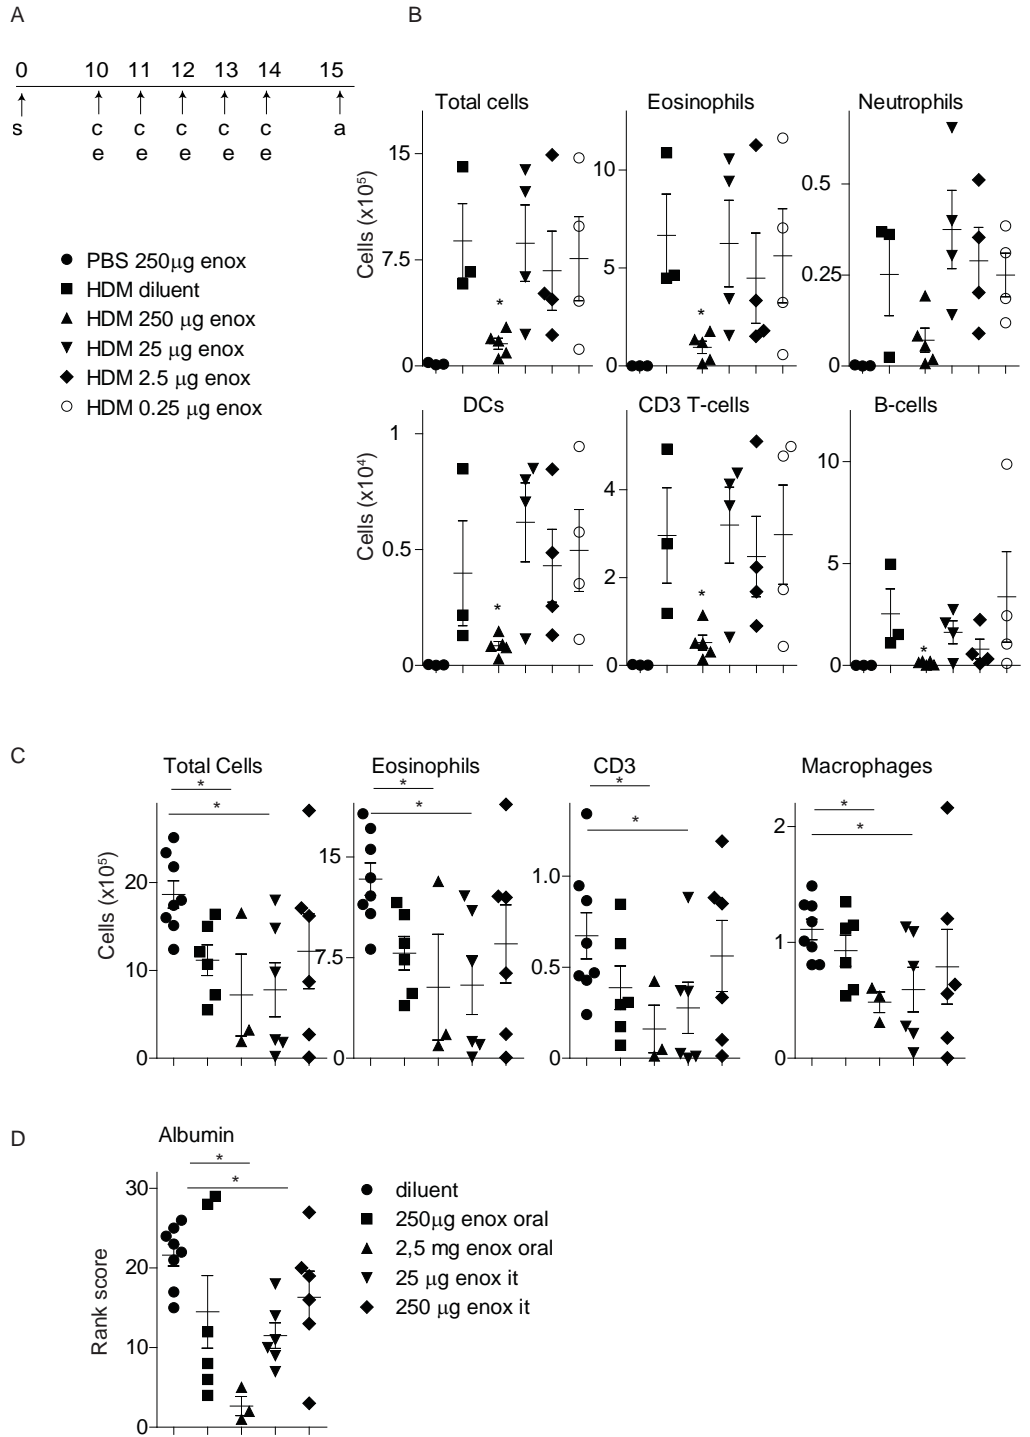

Supplement: sd1 [file 1]
